# Supplementary material for: Structure of the Exopolysaccharide Secreted by a Marine Strain Vibrio alginolyticus
Source: MDPI journal article supplement (doi:10.3390/md16050164), 2018-05-15
Supplement: s1 [file s1]

Supplementary informations

# Structure of the exopolysaccharide secreted by a marine strain *Vibrio alginolyticus*

Sophie Drouillard <sup>1</sup>, Isabelle Jeacomine <sup>1</sup>, Laurine Buon <sup>1</sup>, Claire Boisset <sup>1</sup>, Anthony Courtois <sup>2</sup>, Bertrand Thollas <sup>2</sup>, Pierre-Yves Morvan <sup>3</sup>, Romuald Vallée <sup>3</sup> and William Helbert <sup>1\*</sup>

<sup>1</sup> Université Grenoble Alpes, CERMAV, 38000 Grenoble, France

CNRS, Centre de Recherches sur les Macromolécules Végétales (CERMAV), 38000 Grenoble, France; E-Mails:

sophie.drouillard@cermav.cnrs.fr (S.D.); isabelle.jecomine@cermav.cnrs.fr (I.J.);

laurine.buon.drouillard@cermav.cnrs.fr (L.B.); claire.boisset-helbert@cermav.cnrs.fr (C.B.);

william.helbert@cermav.cnrs.fr (W.H.)

<sup>2</sup> POLYMARIS BIOTECHNOLOGY, Aéroport Centre, 29600 Morlaix; E-Mails:

Anthony.courtois@polymaris.com (A.C.); Bertrand.thollas@polymaris.com (B.T.)

<sup>3</sup> CODIF INTERNATIONAL, 35400 Roz-sur-Couesnon, France; E-Mails: py.morvan@codif.com (P.M.);

r.vallee@codif.com (R.V.)

\* Correspondence: william.helbert@cermav.cnrs.fr (W.H.); Tel.: +33 (0)4 76 03 76; Fax: +33 (0)4 76 54 72 03.

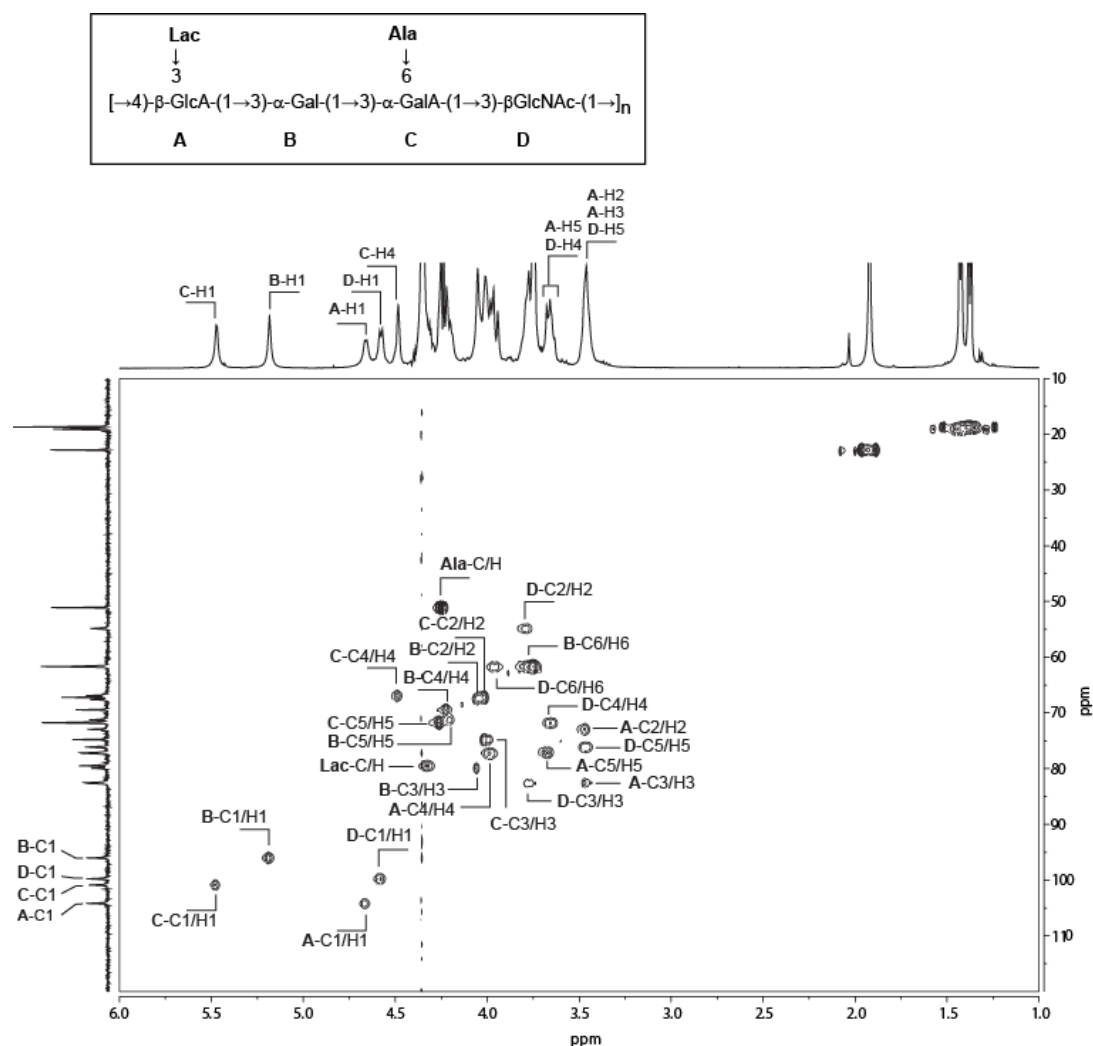

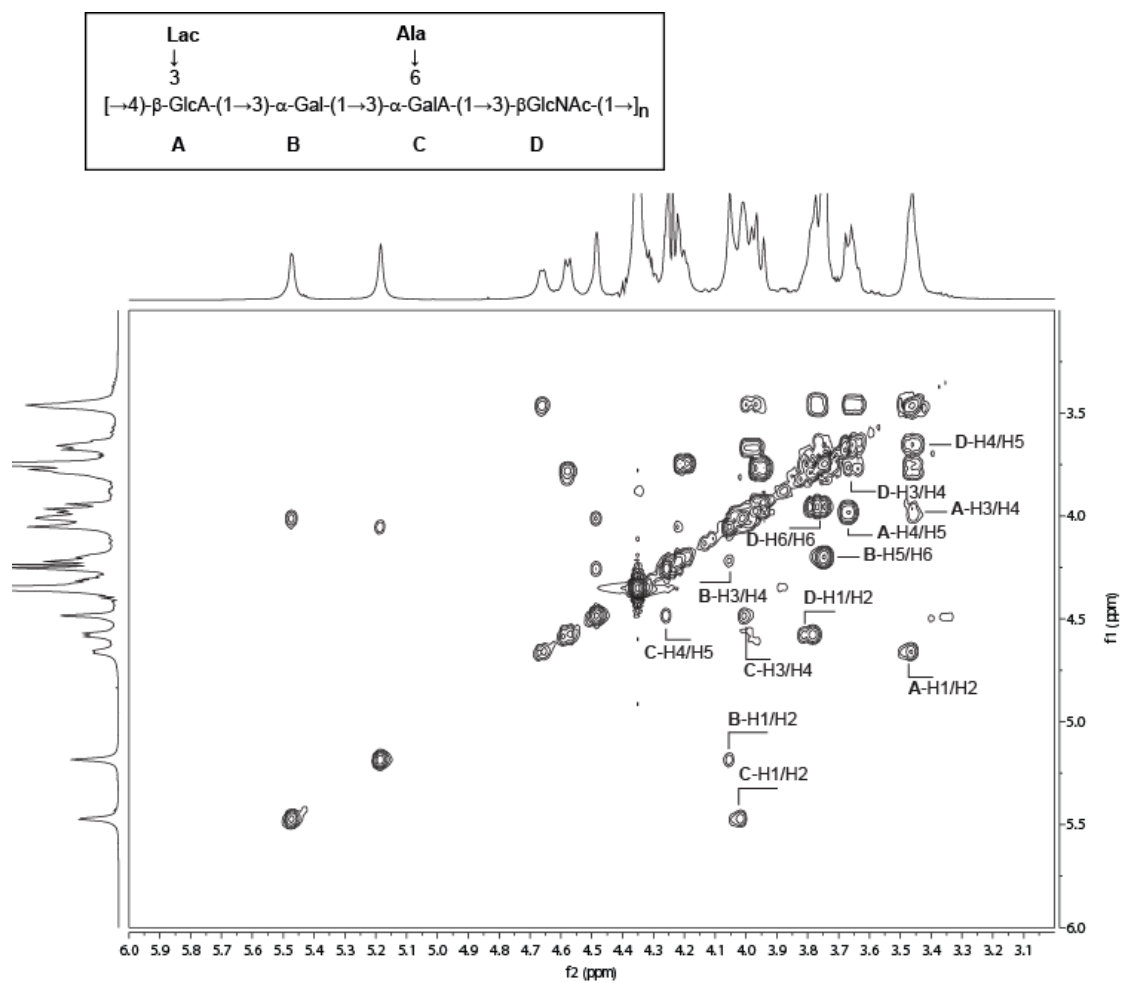

**Figure S2.** COSY spectrum of the *Vibrio alginolyticus* exopolysaccharide. The spectrum was recorded at 343 K.

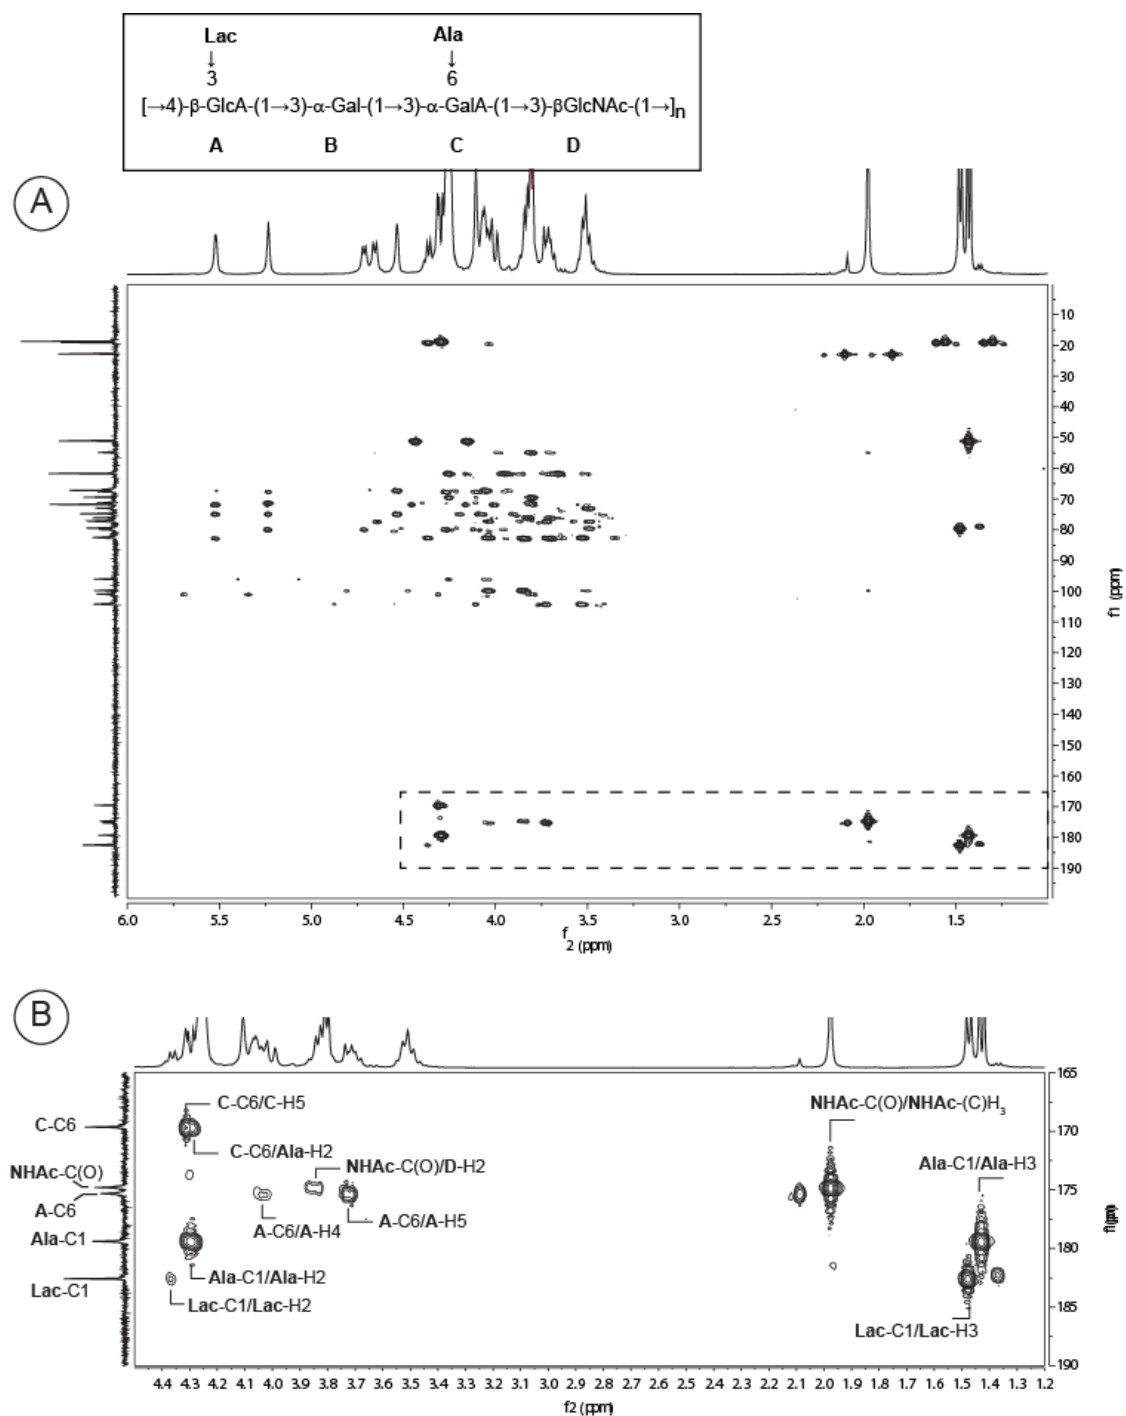

**Figure S3.** A) HMBC spectrum of the *Vibrio alginolyticus* exopolysaccharide. The spectrum was recorded at 353 K. B) Enlarged part of the HMBC spectra highlighting the coupling of alanine and lactate derivatives.
